# Supplementary material for: Thermal insulation and stability of polysiloxane foams containing hydroxyl-terminated polydimethylsiloxanes
Source: Royal Society of Chemistry journal article supplement (doi:10.1039/c8ra00222c), 2018-01-01
Supplement: c8ra00222c1.pdf [file c8ra00222c1.pdf]

The molecular weight of OH-PDMS can be controlled by adjusting the reaction condition, such as reaction temperature, the amount of catalyst, the amount of end-blocking agent and the polymerization time. In the reaction process, the mass of octamethylcyclotetrasiloxane was 40g.

Table P1. Effect of reaction temperature on the molecular weight of OH-PDMS.

| Run | Temperature (°C) | Mn    | Mw     | PDI  |
|-----|------------------|-------|--------|------|
| 1   | 70               | 29535 | 40201  | 1.36 |
| 2   | 80               | 31143 | 41042  | 1.32 |
| 3   | 90               | 39790 | 69945  | 1.76 |
| 4   | 100              | 40224 | 64760  | 1.61 |
| 5   | 120              | 47210 | 108583 | 2.30 |

Conditions: The polymerization was carried for 6 h, the amount of catalyst was 0.4g, and the amount of end-blocking agent was 0.0486g.

Table P2. Effect of the amount of catalyst on the molecular weight of OH-PDMS.

| Run | Catalyst (g) | Mn    | Mw    | PDI  |
|-----|--------------|-------|-------|------|
| 1   | 0.2          | 22312 | 29643 | 1.32 |
| 2   | 0.4          | 26608 | 36985 | 1.39 |
| 3   | 0.6          | 45235 | 67169 | 1.48 |
| 4   | 0.8          | 60318 | 77850 | 1.28 |
| 5   | 1.0          | 63478 | 91997 | 1.44 |

Conditions: The polymerization was carried for 6 h, the reaction temperature was 80°C, and the amount of end-blocking agent was 0.0486g.

Table P3. Effect of the amount of end-blocking agent on the molecular weight of OH-PDMS.

| Run | end-blocking agent (g) | Mn    | Mw    | PDI  |
|-----|------------------------|-------|-------|------|
| 1   | 0.0810                 | 20136 | 26378 | 1.31 |
| 2   | 0.0607                 | 26718 | 36870 | 1.38 |
| 3   | 0.0486                 | 30691 | 39898 | 1.30 |
| 4   | 0.0405                 | 40182 | 56656 | 1.41 |
| 5   | 0.0347                 | 46286 | 62948 | 1.36 |

Conditions: The polymerization was carried for 6 h, the reaction temperature was 80°C, and the amount of catalyst was 0.4g.

Table P4. Effect of the polymerization time on the molecular weight of OH-PDMS.

| Run | polymerization time (h) | Mn    | Mw    | PDI  |
|-----|-------------------------|-------|-------|------|
| 1   | 3                       | 13338 | 22407 | 1.70 |
| 2   | 4                       | 16335 | 27769 | 1.68 |
| 3   | 5                       | 25306 | 39224 | 1.55 |
| 4   | 6                       | 28674 | 42437 | 1.48 |
| 5   | 7                       | 31982 | 45094 | 1.41 |

Conditions: The reaction temperature was 80°C, and the amount of catalyst was 0.4g, and the amount of end-blocking agent was 0.0486g.
